# Supplementary material
Source: Research Square preprint supplement (doi:10.21203/rs.3.rs-9147716/v1)
Supplement: Supplementary file 1 [file 733ac707a2dcb8e4a5c36032.docx]

**Supplemental Materials**


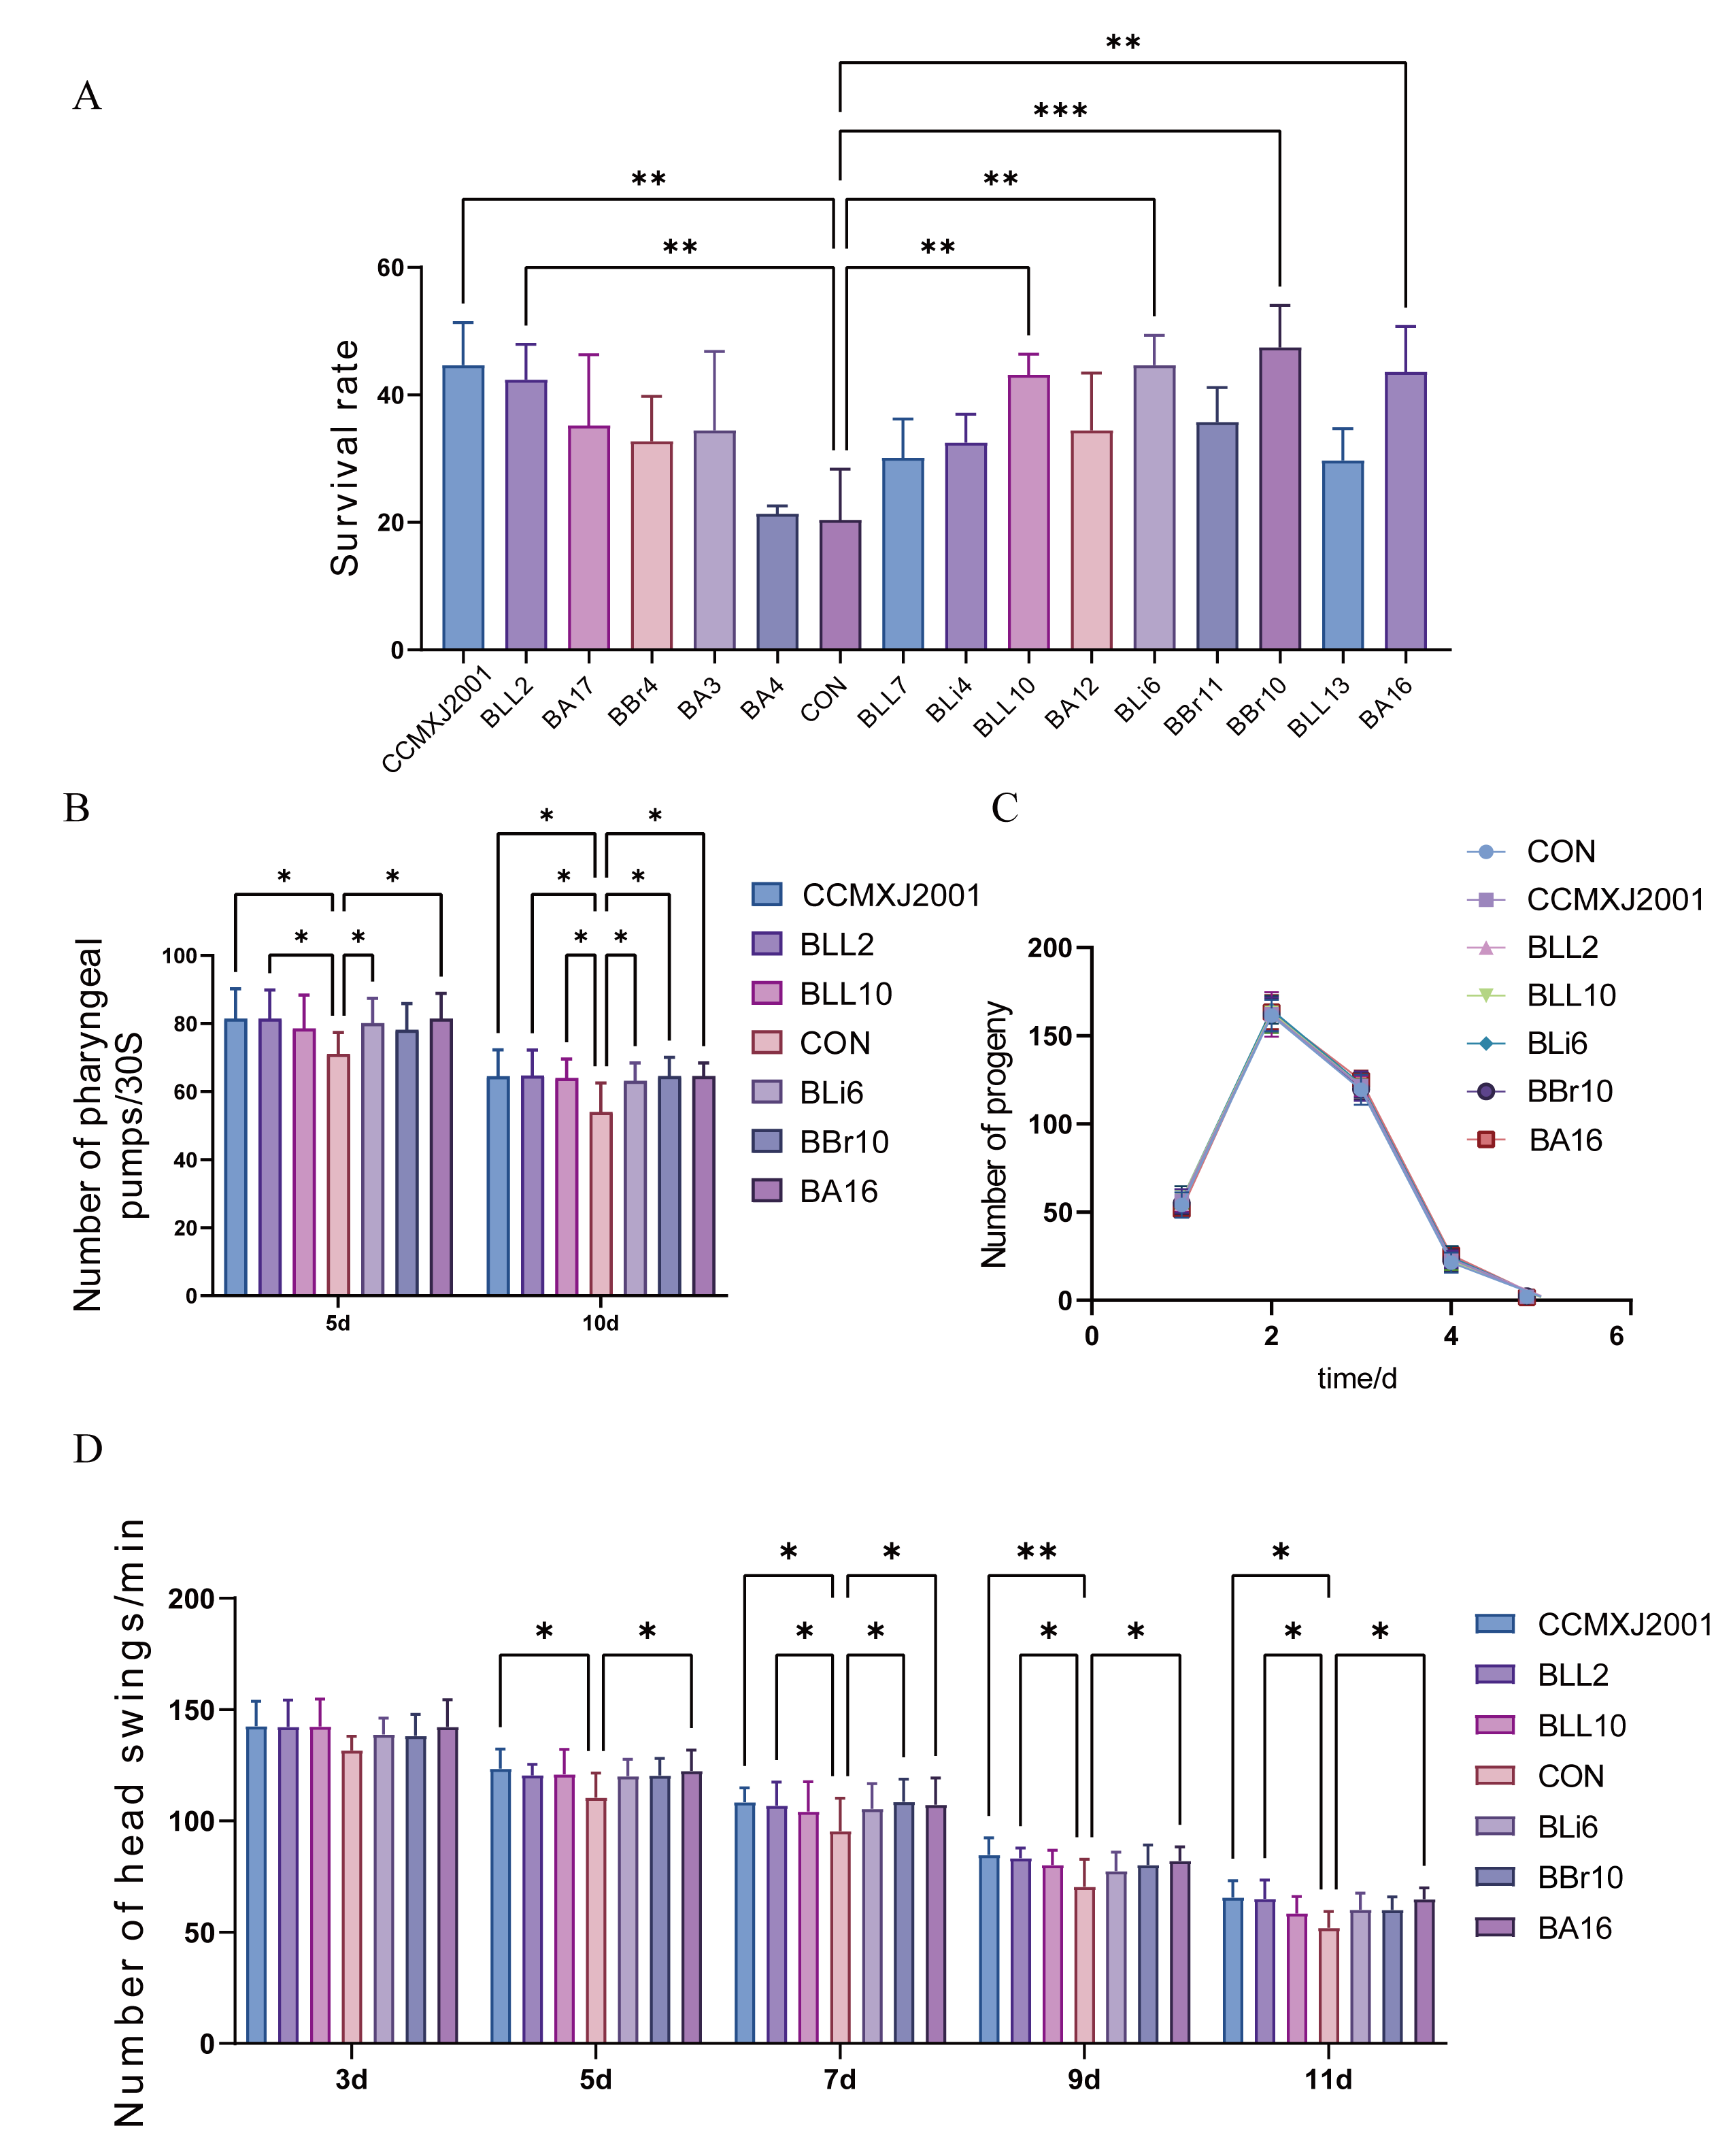


**Fig. S1** **Physiological indicators of *C. elegans*.**(A) Oxidative stress survival rate (n=3). (B) Frequency of pharyngeal pumping of *C. elegans* (n=9). (C) Frequency of head-shaking of *C. elegans* (n=9).(D) The number of egg of *C. elegans*. (n=9). * p < 0.05, ** p < 0.01, *** p< 0.001.


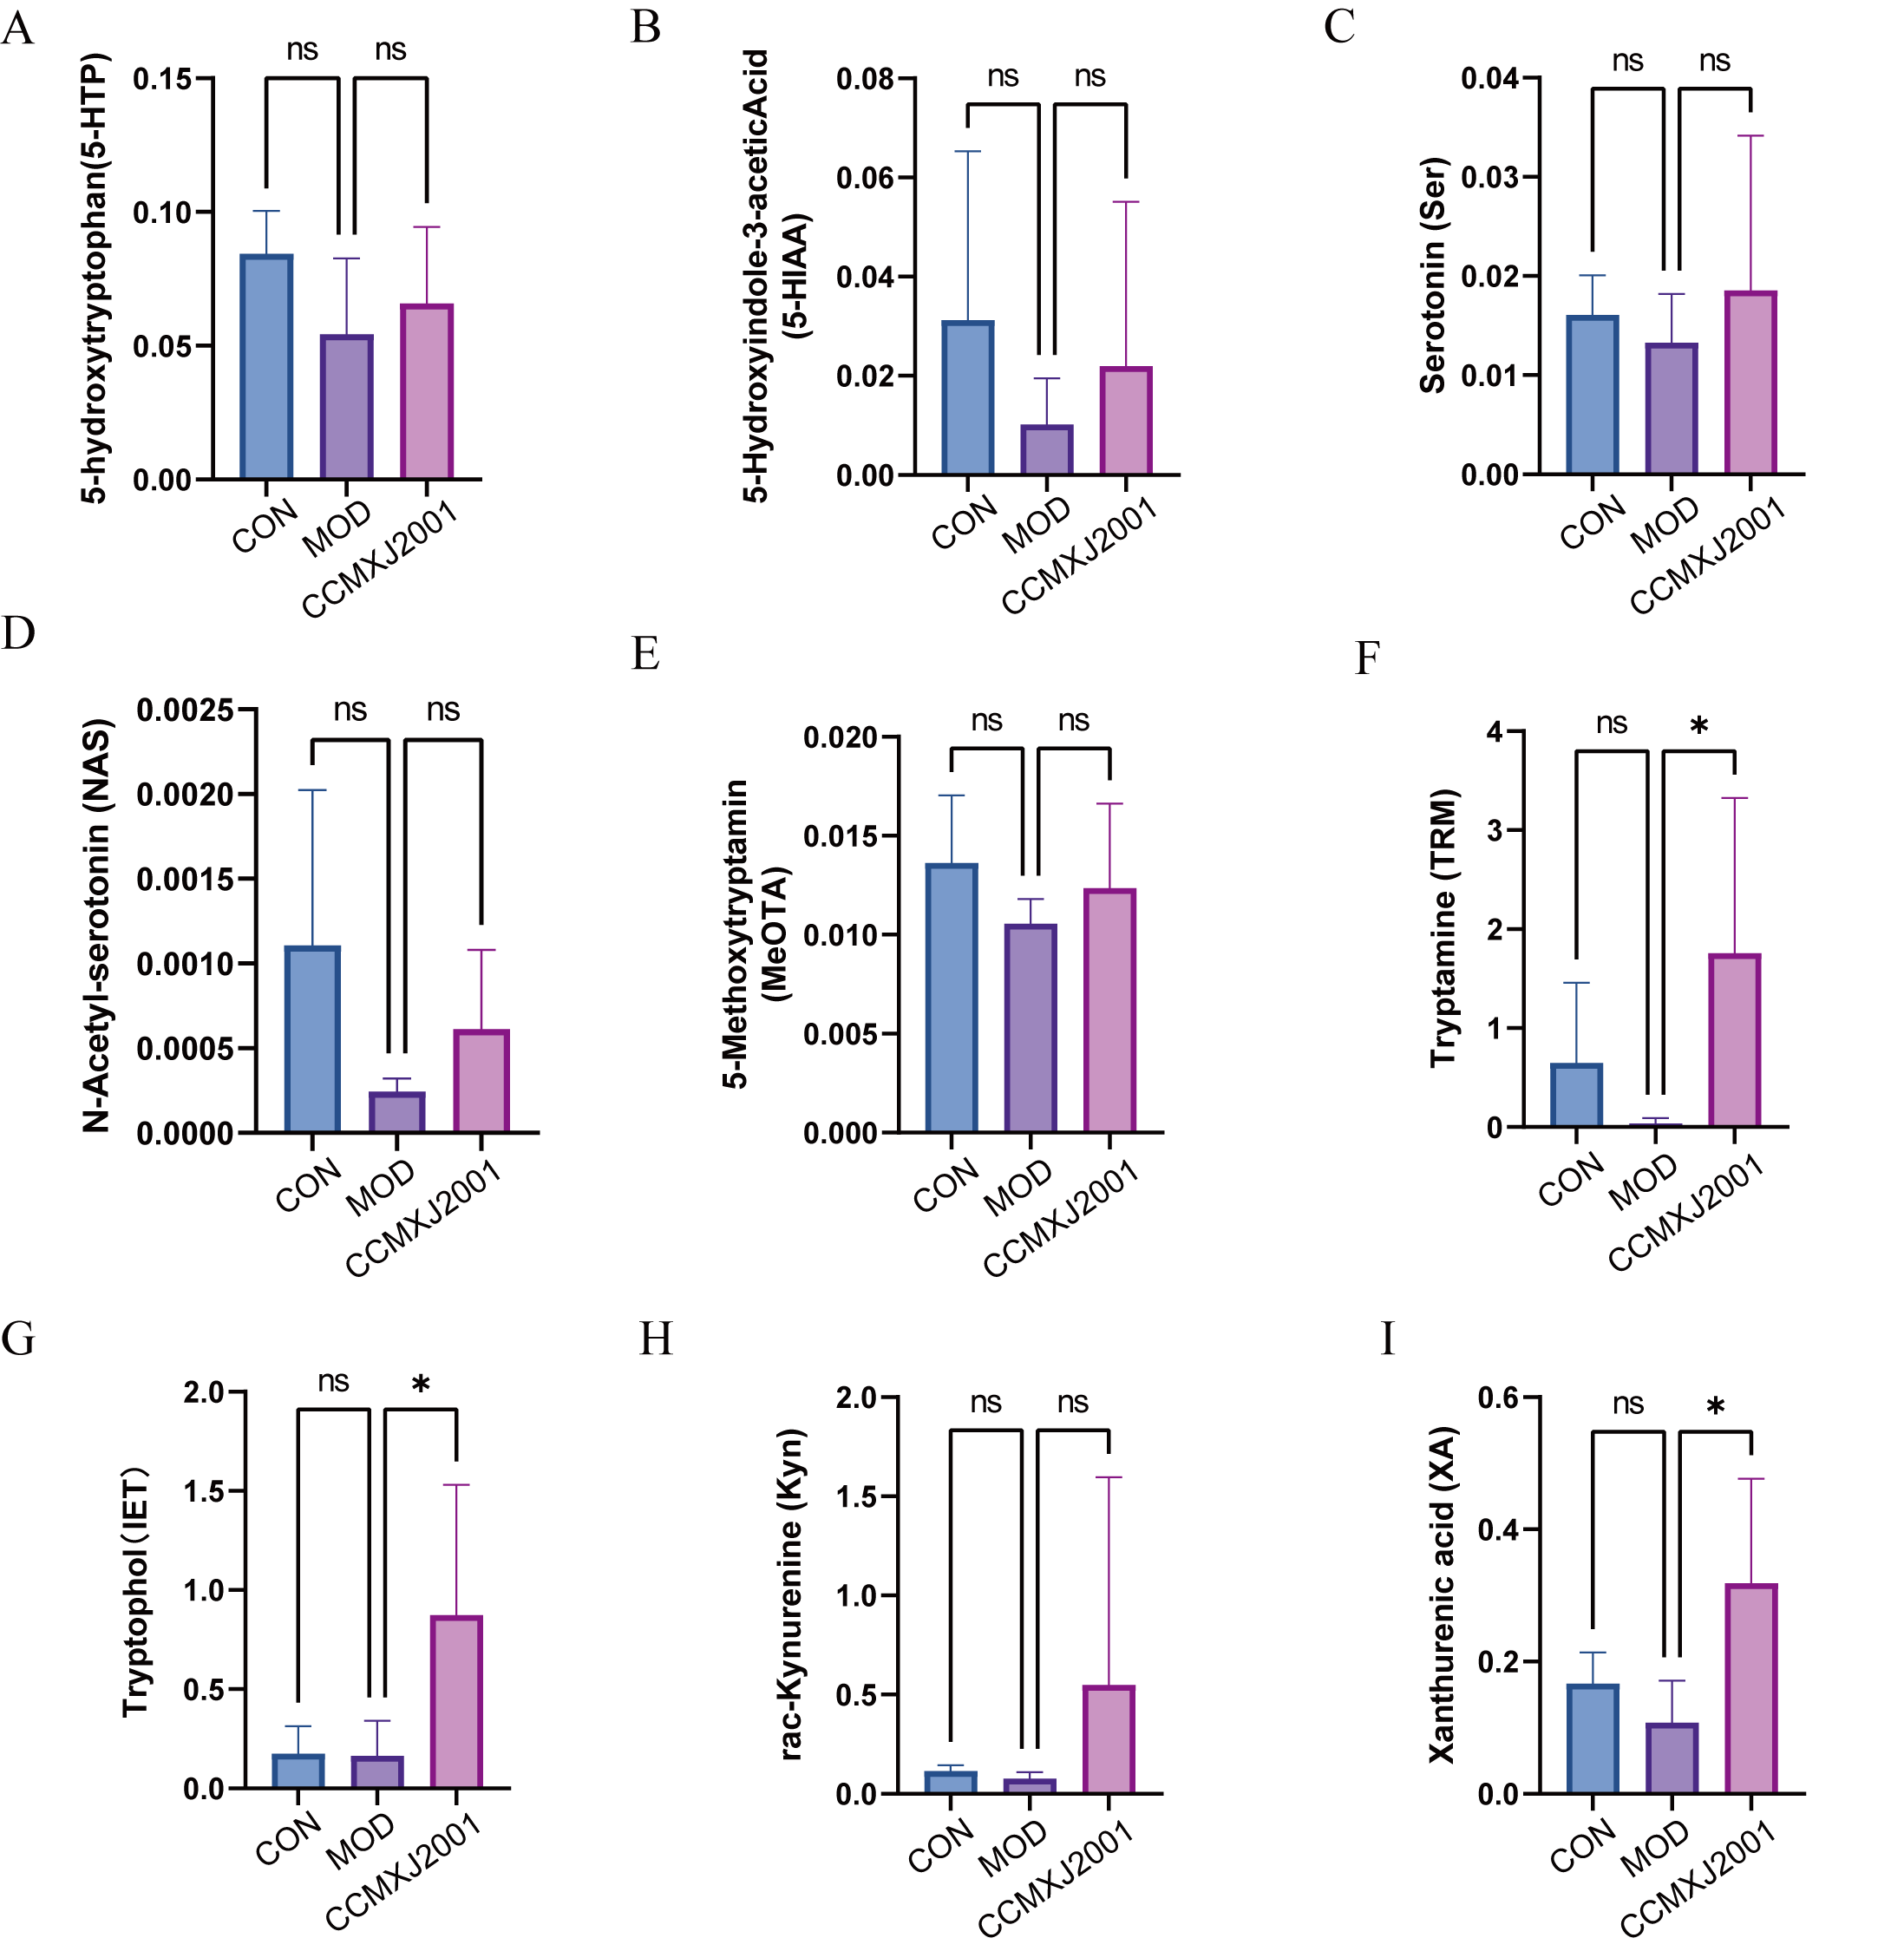


**Fig. S2 Tryptophan metabolism of mice feces.** (A) 5-hydroxytryptophan. (B) 5-Hydroxyindole-3-aceticAcid. (C) Serotonin. (D) N-Acetyl-serotonin. (E) 5-Methoxytryptamin. (F) Tryptamine. (G) Tryptophol. (H) rac-Kynurenine. (I) Xanthurenic acid.* p < 0.05, ** p < 0.01, *** p< 0.001, ns, no significance.

**Fig. S3 Original Western blot images.** (A) NQO1. (B) Keap1. (C) Nrf2. (D) HO-1.(E) CYP2E1.

Table S1 *Bifidobacterium* species information

| Species | Original  number | Serial  number | Species | Original  number | Serial  number |
| --- | --- | --- | --- | --- | --- |
| B. longum  subsp. longum | FSD1B13 | CCMXJ2001 | B. breve | FSL1B1 | BBr1 |
| FSD2B2 | BLL2 | FSL2B5 | BBr2 |
| FSL2B1 | BLL3 | FJS2B3 | BBr3 |
| FJS4B11 | BLL4 | FJS4B6 | BBr4 |
| FJS6B6 | BLL5 | FJS5B20 | BBr5 |
| FJS10B1 | BLL7 | FJS10B6 | BBr6 |
| FJS11B1 | BLL8 | FJS12B5 | BBr7 |
| FJS14B8 | BLL9 | FJS15B18 | BBr8 |
| FJS15B4 | BLL10 | FJS16B5 | BBr9 |
| FJS16B23 | BLL11 | FJS18B7 | BBr10 |
| FJS17B26 | BLL12 | FJS17B19 | BBr11 |
| FJS19B17 | BLL13 | FJS19B13 | BBr12 |
| FJS23B23 | BLL14 | FJS21B6 | BBr13 |
| FJS22B21 | BLL15 | FJS22B11 | BBr14 |
| FJS1B10  FJS5B6  FJS12B1  FJS13B4  FJS16B31  FJS17B14  FJS20B4  FJS23B1  FJS24B5  FJS25B8  FJS14B4 | BLi1  BLi2  BLi3  BLi4  BLi5  BLi6  BLi7  BLi8  BLi9  BLi10  BLi11 | B. animalis | FJS1B7 | BA1 |
| B. longum  subsp. infantis | FJS4B1 | BA2 |
| FJS5B11 | BA3 |
| FJS6B1 | BA4 |
| FJS7B16 | BA5 |
| FJS8B1 | BA6 |
| FJS11B4 | BA7 |
| FJS12B15 | BA8 |
| FJS13B14 | BA9 |
| FJS14B5 | BA10 |
| FJS15B23 | BA11 |
| FSD1B12 | BBi1 | FJS16B26 | BA12 |
| B.bifidum | FJS22B12 | BBi2 | FJS20B1 | BA13 |
| FJS5B1 | BAd1 | FJS23B10 | BA14 |
| B. adolescentis | FJS13B21 | BAd2 | FJS24B4 | BA15 |
| FJS18B12 | BAd3 | FJS25B1 | BA16 |

Table S2 Primer sequence.

| GEEN | Primer (5′-3′) | |
| --- | --- | --- |
| Nrf2 | Forward | CAGAGTGATGGTTGCCCACT |
| Reverse | CACACACTTTCTGCGTGCTC |
| HO-1 | Forward | AGCCCCACCAAGTTCAAACA |
| Reverse | CATCACCTGCAGCTCCTCAA |
| NQO1 | Forward | CATTGCAGTGGTTTGGGGTG |
| Reverse | GAGTACATGGAGCCGCTACC |
| KEAP1 | Forward | GATGGGCAGGACCAGTTGAA |
| Reverse | CGAGGACGTAGATCTTGCCC |

Table S3 DPPH and ABTS radical scavenging rate

| Number | Serial number | DPPH radical  scavenging rate/% | ABTS radical  scavenging rate/% |
| --- | --- | --- | --- |
| 1 | BBr1 | 65.64±6.32 | 52.22±3.18 |
| 2 | BA1 | 76.39±4.82 | 49.35±4.73 |
| 3 | BA1 | 70.94±4.92 | 44.46±5.88 |
| 4 | BBi1 | 71.41±6.54 | 50.76±4.41 |
| 5 | CCMXJ2001 | 84.23±5.94 | 63.44±2.41 |
| 6 | BLL3 | 67.25±3.56 | 43.17±3.26 |
| 7 | BLL2 | 83.27±1.73 | 60.11±3.34 |
| 8 | BBr3 | 70.93±5.19 | 34.12±4.17 |
| 9 | BBr2 | 73.08±2.85 | 43.61±2.48 |
| 10 | BA17 | 65.93±7.02 | 60.81±2.09 |
| 11 | BA2 | 68.05±5.42 | 40.92±4.64 |
| 12 | BBr4 | 74.55±4.17 | 60.54±3.37 |
| 13 | BLL4 | 70.64±4.53 | 33.01±2.93 |
| 14 | BAd1 | 61.15±1.96 | 30.85±5.34 |
| 15 | BLi2 | 64.64±5.64 | 29.65±5.03 |
| 16 | BA3 | 73.04±3.93 | 61.17±1.86 |
| 17 | BBr5 | 64.61±3.43 | 30.74±3.99 |
| 18 | BA4 | 68.48±4.53 | 60.69±0.97 |
| 19 | BLL5 | 65.45±1.96 | 35.26±3.28 |
| 20 | BA5 | 66.45±2.90 | 30.26±3.30 |
| 21 | BA6 | 63.36±1.62 | 36.34±5.33 |
| 22 | BLL7 | 80.55±4.59 | 60.49±2.44 |
| 23 | BBr6 | 68.85±1.73 | 45.29±4.09 |
| 24 | BLL8 | 67.38±3.22 | 37.61±5.36 |
| 25 | BA7 | 65.64±0.92 | 23.31±4.93 |
| 26 | BLi3 | 65.21±2.21 | 36.55±3.94 |
| 27 | BBr7 | 60.02±2.71 | 37.93±4.91 |
| 28 | BA8 | 70.58±1.46 | 41.28±1.44 |
| 29 | BLi4 | 80.54±4.28 | 53.61±3.85 |
| 30 | BA9 | 70.18±4.35 | 34.17±2.56 |
| 31 | BAd2 | 72.31±5.78 | 49.13±3.73 |
| 32 | BLi11 | 70.51±3.08 | 45.43±2.25 |
| 33 | BA10 | 64.61±3.64 | 35.08±5.59 |
| 34 | BLL9 | 73.06±1.71 | 39.80±2.55 |
| 35 | BLL10 | 83.36±4.56 | 60.76±3.23 |
| 36 | BBr8 | 74.36±5.97 | 37.07±4.54 |
| 37 | BA11 | 68.75±4.83 | 42.91±2.52 |
| 38 | BBr9 | 71.71±3.95 | 48.21±1.18 |
| 39 | BLL11 | 75.76±5.99 | 26.97±2.35 |
| 40 | BA12 | 84.02±3.20 | 58.30±0.75 |
| 41 | BLi5 | 73.85±5.44 | 36.23±2.90 |
| 42 | BLi6 | 82.06±1.39 | 62.14±3.23 |
| 43 | BBr11 | 84.19±4.38 | 60.15±4.32 |
| 44 | BLi12 | 72.19±3.45 | 23.64±1.69 |
| 45 | BBr10 | 84.86±3.36 | 62.70±2.25 |
| 46 | BAd3 | 63.49±5.39 | 38.05±4.45 |
| 47 | BBr12 | 71.87±6.36 | 24.32±3.66 |
| 48 | BA13 | 70.26±5.95 | 44.28±4.37 |
| 49 | BLi7 | 72.75±2.33 | 38.37±5.59 |
| 50 | BBr13 | 76.36±4.51 | 26.59±5.39 |
| 51 | BBr14 | 74.88±2.56 | 36.28±3.14 |
| 52 | BBi2 | 68.01±4.71 | 21.89±2.32 |
| 53 | BLL15 | 78.12±3.54 | 22.43±4.63 |
| 54 | BLi8 | 69.92±2.46 | 36.73±3.18 |
| 55 | BA18 | 77.91±2.35 | 32.85±2.87 |
| 56 | BLL14 | 71.49±3.89 | 26.84±1.52 |
| 57 | BA15 | 72.78±2.35 | 27.05±2.25 |
| 58 | BLI9 | 76.36±3.28 | 36.23±6.75 |
| 59 | BA16 | 87.49±3.41 | 59.18±3.23 |
| 60 | BLi10 | 75.02±4.38 | 51.66±3.11 |
